# Supplementary material for: 3D graphene-supported N-doped hierarchically porous carbon for capacitive deionization of saline water
Source: Royal Society of Chemistry journal article supplement (doi:10.1039/d2en01103d), 2023-01-01
Supplement: d2en01103d1.pdf [file d2en01103d1.pdf]

***Electronic supplementary information (ESI)***

**†3D Graphene-supported N-doped Hierarchically Porous Carbon  
for Capacitive Deionization of Saline Water**

*Bin Feng<sup>a</sup>, Zaheen Ullah Khan<sup>a,b\*</sup>, Wasid Ullah Khan<sup>c,d</sup>*

*<sup>a</sup>Department of Chemistry, Research Center of Nano Science and Technology, Shanghai University, Shanghai, 200444, China.*

*<sup>b</sup>School of Environmental Science and Engineering, Southern University of Science and Technology (SUSTech), Shenzhen 518055, China*

*<sup>c</sup>State Key Laboratory of Electroanalytical Chemistry, Changchun Institute of Applied Chemistry, Chinese Academy of Sciences, 5625 Renmin Street, Changchun, 130022 China*

*<sup>d</sup>School of Applied Chemistry and Engineering, University of Science and Technology of China, Hefei, Anhui 230026, P.R. China*

*\*corresponding Author.*

Email: [khan@sustech.edu.cn](mailto:khan@sustech.edu.cn)

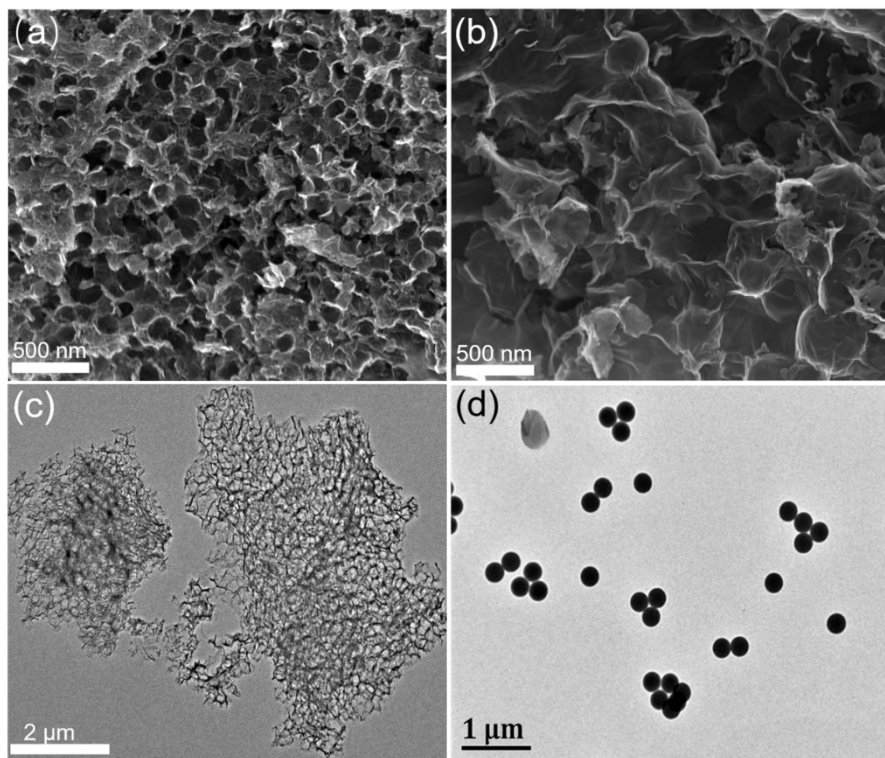

**Fig. S1.** (a and b) SEM images of the prepared 3DNHPC. (c) HRTEM images of the 3DNHPC. (d)

TEM images of the polystyrene microspheres

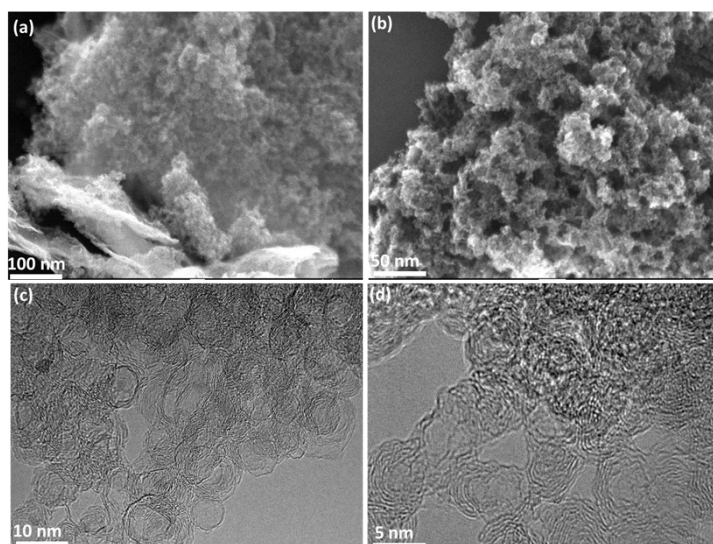

**Fig. S2.** (a-b) HRSEM and (c-d) HRTEM images of the 3DG.

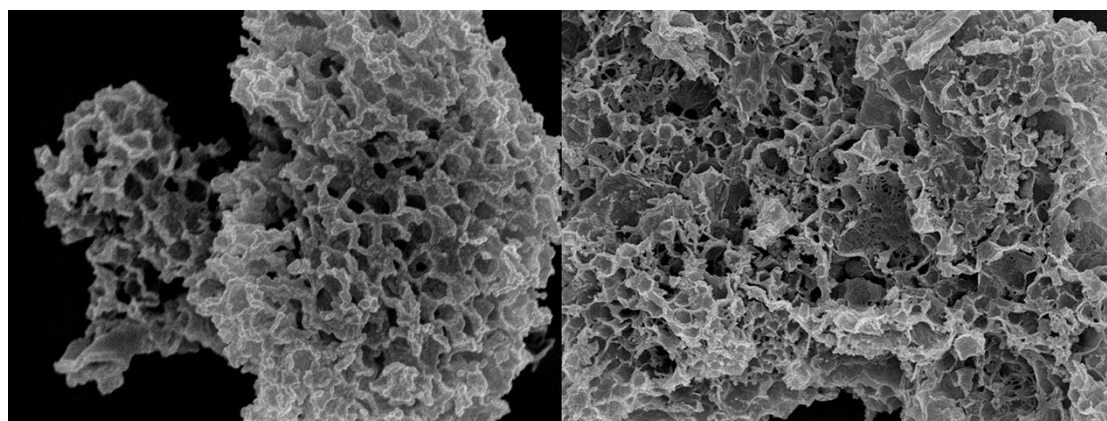

**Fig. S3.** HRSEM images of 3DNHPC.

**Table S1** Specific surface area, pore size and pore volume for the investigated 3DG and 3DNHPC

| Samples | Specific surface area ( $\text{m}^2 \text{g}^{-1}$ ) | Average pore size (nm) | Pore volume ( $\text{cm}^3 \text{g}^{-1}$ ) |
|---------|------------------------------------------------------|------------------------|---------------------------------------------|
| 3DG     | 450                                                  | 31.2                   | 0.35                                        |
| 3DNHPC  | 650                                                  | 10.3                   | 0.16                                        |

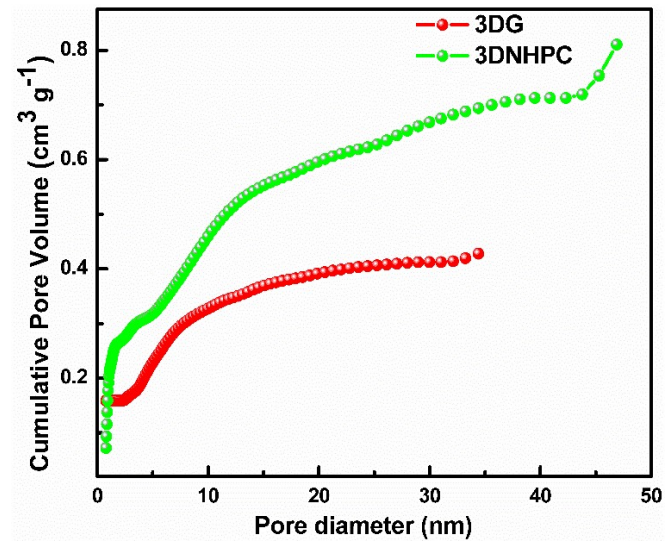

Fig. S4. Cumulative pore volumes of 3DNHPC and 3DG.

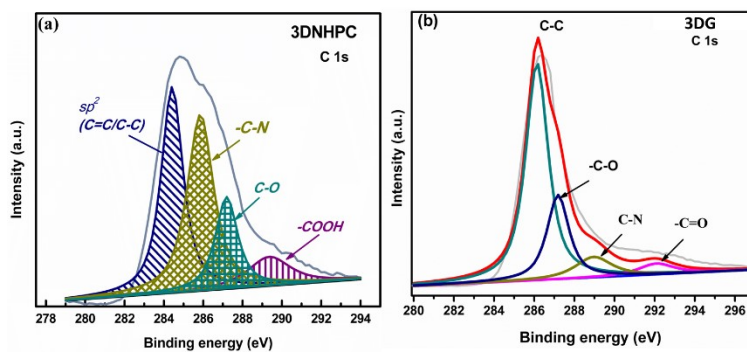

Fig. S5. C 1s spectra of (a) 3DNHPC and (b) 3DG.

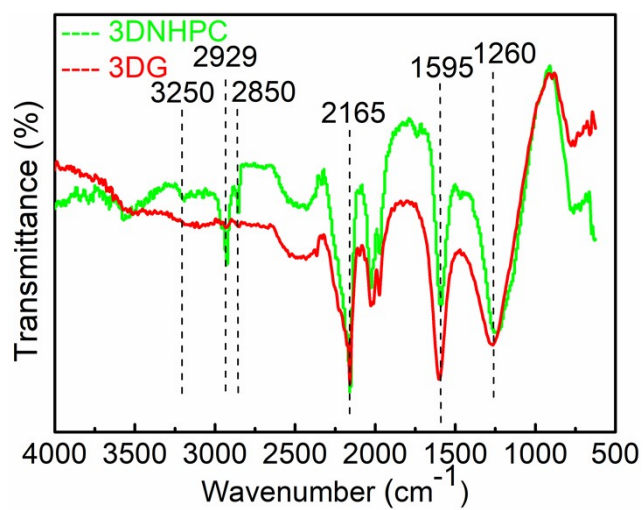

Fig. S6. FT-IR spectra of the 3DNHPC and 3DG

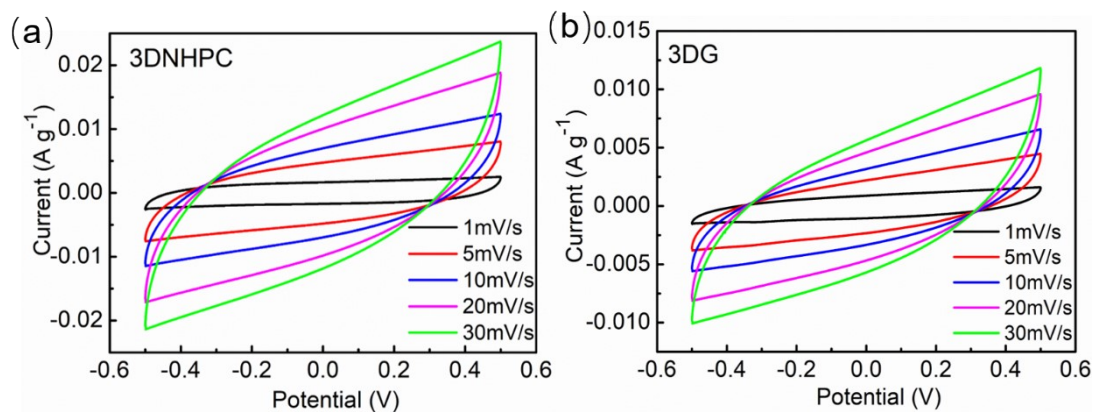

Fig. S7. Cyclic voltammograms of (a) 3DNHPC and (b) 3DG at different scan rate

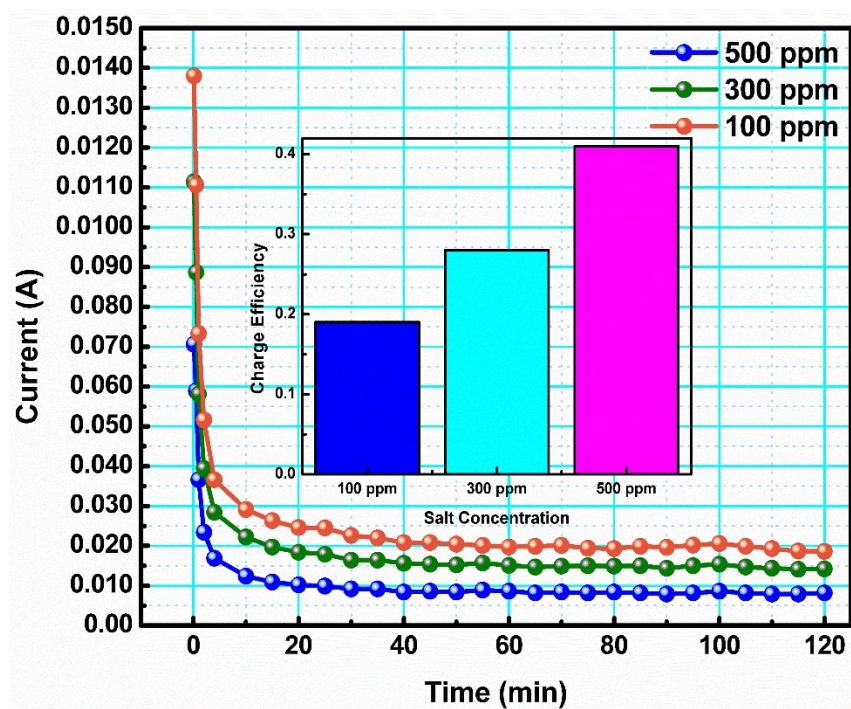

Fig. S8. Current transient and charge efficiency of 3DNHPC in different salt concentration.

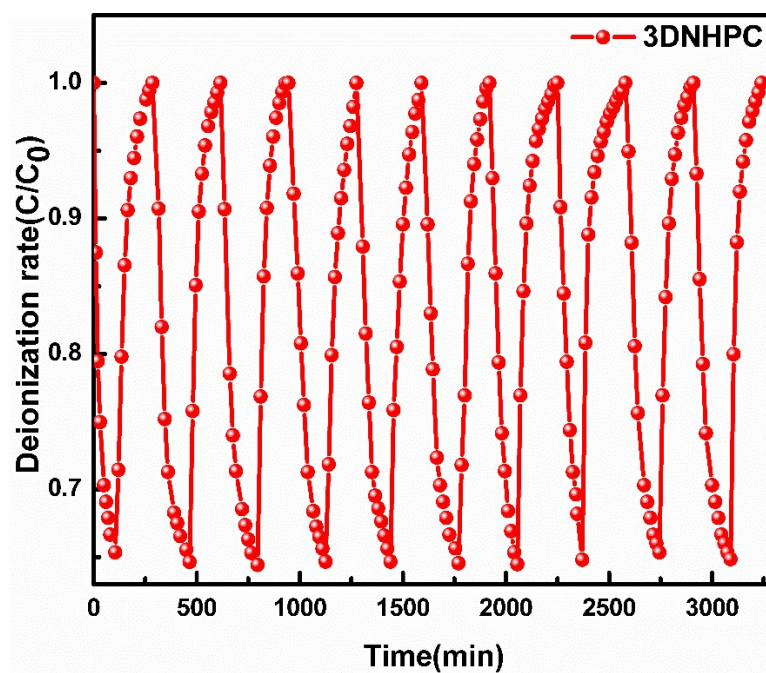

Fig. S9. Long term adsorption/desorption curves of 3DNHPC in  $500 \text{ mg L}^{-1}$  at 1.2 V.

**Table S2** Comparison of salt adsorption capacity of reported carbon materials.

| Electrode materials                                 | Applied voltage [V] | Initial NaCl concentration [mg L <sup>-1</sup> ] | Adsorption capacity [mg g <sup>-1</sup> ] | Ref.      |
|-----------------------------------------------------|---------------------|--------------------------------------------------|-------------------------------------------|-----------|
| Graphene Aerogels                                   | 1.2                 | 500                                              | 9.9                                       | 1         |
| N-doped porous carbon spheres                       | 1.2                 | 500                                              | 13.71                                     | 2         |
| Nitrogen-doped carbon nanorods                      | 1.2                 | 500                                              | 17.62                                     | 3         |
| porous carbon spheres                               | 1.2                 | 500                                              | 12.8                                      | 4         |
| Micro/mesoporous carbon sheets                      | 1.2                 | 500                                              | 17.38                                     | 5         |
| Graphene bonded carbon nanofiber aerogels           | 1.2                 | 500                                              | 15.7                                      | 6         |
| 3D Intercalated                                     | 1.2                 | 500                                              | 22.09                                     | 7         |
| Graphene Sheet-Sphere Nanocomposite 3D graphene     | 1.2                 | 500                                              | 14.7                                      | 8         |
| N-doped porous hollow carbon spheres                | 1.4                 | 500                                              | 12.95                                     | 9         |
| Layered graphene/mesoporous carbon heterostructures | 1.5                 | 500                                              | 24.3                                      | 10        |
| Porous graphene frameworks                          | 1.4                 | 500                                              | 19.1                                      | 11        |
| 3DNHPCs                                             | 1.2                 | 500                                              | 25.5                                      | This work |



## References

1. H. Yin, S. Zhao, J. Wan, H. Tang, L. Chang, L. He, H. Zhao, Y. Gao and Z. Tang, Three-dimensional graphene/metal oxide nanoparticle hybrids for high-performance capacitive deionization of saline water, *Advanced materials*, 2013, **25**, 6270-6276.
2. Y. Liu, T. Chen, T. Lu, Z. Sun, D. H. Chua and L. Pan, Nitrogen-doped porous carbon spheres for highly efficient capacitive deionization, *Electrochimica Acta*, 2015, **158**, 403-409.
3. Y. Liu, X. Xu, M. Wang, T. Lu, Z. Sun and L. Pan, Nitrogen-doped carbon nanorods with excellent capacitive deionization ability, *Journal of Materials Chemistry A*, 2015, **3**, 17304-17311.
4. X. Xu, H. Tang, M. Wang, Y. Liu, Y. Li, T. Lu and L. Pan, Carbon spheres with hierarchical micro/mesopores for water desalination by capacitive deionization, *Journal of Materials Chemistry A*, 2016, **4**, 16094-16100.
5. S. Zhao, T. Yan, Z. Wang, J. Zhang, L. Shi and D. Zhang, Removal of NaCl from saltwater solutions using micro/mesoporous carbon sheets derived from watermelon peel via deionization capacitors, *RSC advances*, 2017, **7**, 4297-4305.
6. G. Luo, Y. Wang, L. Gao, D. Zhang and T. Lin, Graphene bonded carbon nanofiber aerogels with high capacitive deionization capability, *Electrochimica Acta*, 2018, **260**, 656-663.
7. Z. U. Khan, T. Yan, L. Shi and D. Zhang, Improved capacitive deionization by using 3D intercalated graphene sheet-sphere nanocomposite architectures, *Environmental Science: Nano*, 2018, **5**, 980-991.
8. H. Wang, T. Yan, P. Liu, G. Chen, L. Shi, J. Zhang, Q. Zhong and D. Zhang, In situ creating interconnected pores across 3D graphene architectures and their application as high performance electrodes for flow-through deionization capacitors, *Journal of Materials Chemistry A*, 2016, **4**, 4908-4919.
9. S. Zhao, T. Yan, H. Wang, G. Chen, L. Huang, J. Zhang, L. Shi and D. Zhang, High capacity and high rate capability of nitrogen-doped porous hollow carbon spheres for capacitive deionization, *Applied Surface Science*, 2016, **369**, 460-469.
10. O. Noonan, Y. Liu, X. Huang and C. Yu, Layered graphene/mesoporous carbon heterostructures with improved mesopore accessibility for high performance capacitive deionization, *Journal of Materials Chemistry A*, 2018, **6**, 14272-14280.
11. H. Duan, T. Yan, G. Chen, J. Zhang, L. Shi and D. Zhang, A facile strategy for the fast construction of porous graphene frameworks and their enhanced electrosorption performance, *Chemical Communications*, 2017, **53**, 7465-7468.
